# Supplementary material for: Host Expression of the CD8 Treg/NK Cell Restriction Element Qa-1 is Dispensable for Transplant Tolerance
Source: PubMed Central journal article supplement (PMC5593978; doi:10.1038/s41598-017-11780-2), 2017-09-11

## **Host Expression of the CD8 Treg / NK Cell Restriction Element Qa-1 is Dispensable for Transplant Tolerance**

Blair T. Stocks, PhD<sup>1</sup>, Christopher S. Wilson, BS<sup>1</sup>, Andrew F. Marshall, BA<sup>2</sup>, Lauren A. Brewer<sup>2</sup>, and Daniel J. Moore, MD, PhD<sup>1,2</sup>

**Supplementary Figure 1.** Flow plots of data graphed in **Figure 3B**. Briefly, 12-week old B6 and B6.Qa-1<sup>-/-</sup> mice were left untreated or received a standard 7-day course of anti-CD45RB. Splenic CD8 Treg and NK Cell population frequencies and proliferation were assessed on day 8.

CD8 Treg Numbers

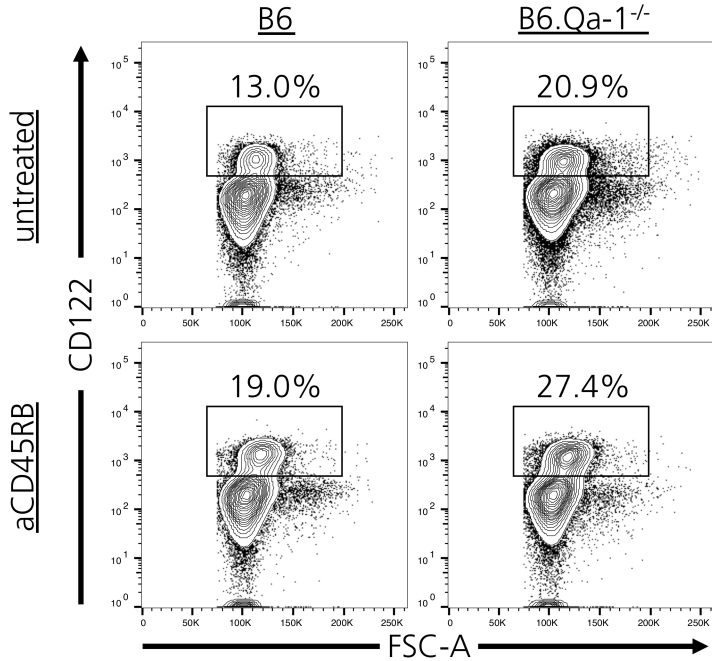

NK Cells Numbers

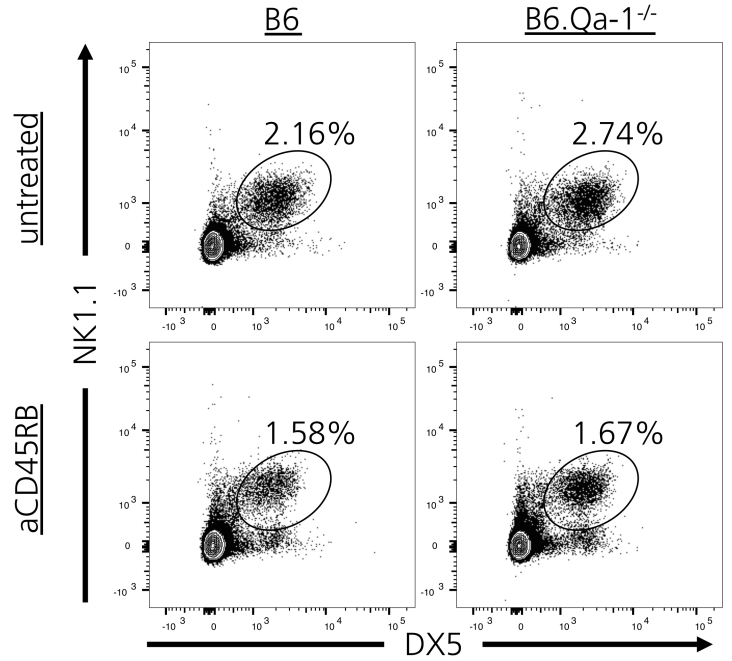

CD8 Treg Proliferation

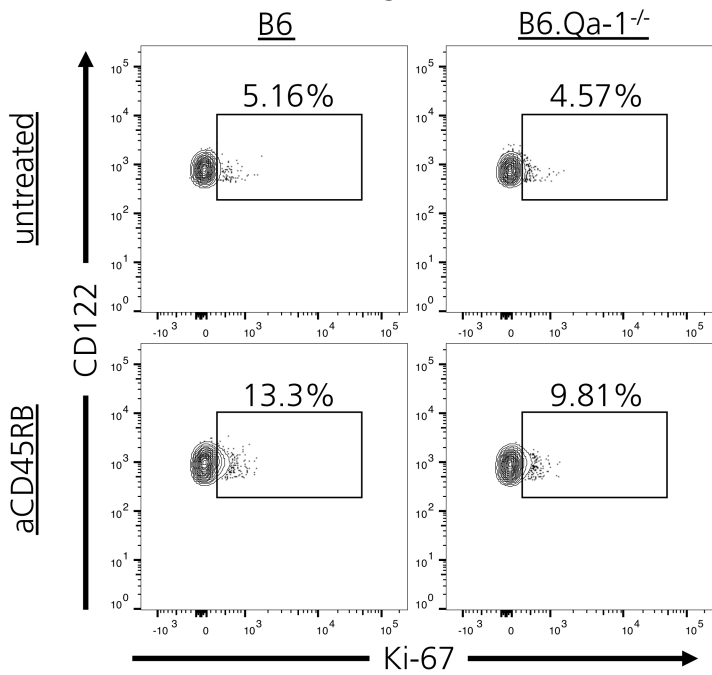

NK Cell Proliferation

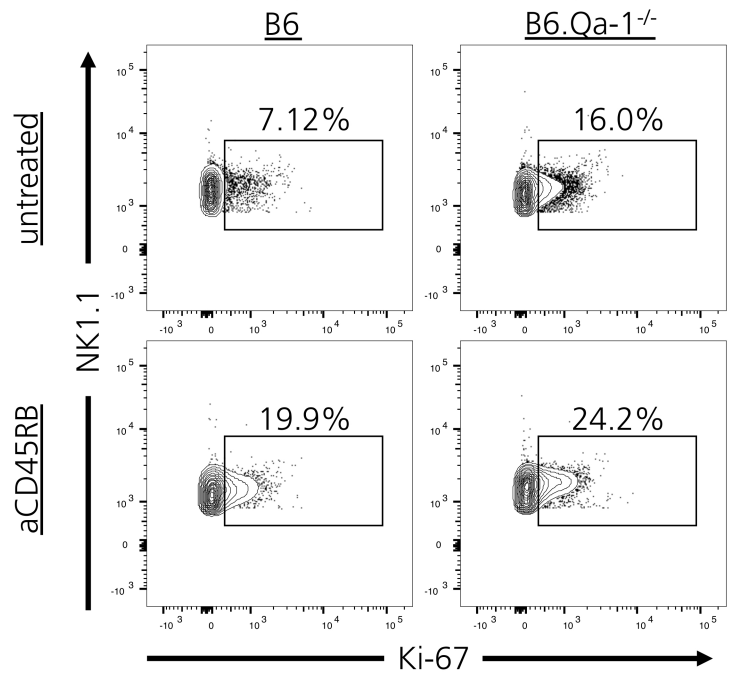

Supplement: 41598_2017_11780_MOESM1_ESM.pdf [file 41598_2017_11780_MOESM1_ESM.pdf]
